# Supplementary material for: A Digital Intervention for Australian Adolescents Above a Healthy Weight (Health Online for Teens): Protocol for an Implementation and User Experience Study
Source: PubMed Central journal article supplement (PMC6913688; doi:10.2196/13340), 2019-10-10
Supplement: resprot_v8i10e13340_app3.pdf [file resprot_v8i10e13340_app3.pdf]

**Multimedia Appendix 2: Schedule of enrolment, interventions, and assessments (SPIRIT template)**

|                                                                                                                                                           | STUDY PERIOD    |                 |                 |   |   |   |   |   |   |   |   |    |    |    |    |           |                  |
|-----------------------------------------------------------------------------------------------------------------------------------------------------------|-----------------|-----------------|-----------------|---|---|---|---|---|---|---|---|----|----|----|----|-----------|------------------|
|                                                                                                                                                           | Enrolment       | Allocation      | Post-allocation |   |   |   |   |   |   |   |   |    |    |    |    | Close-out |                  |
| TIMEPOINT (weeks)                                                                                                                                         | -t <sub>1</sub> | -t <sub>1</sub> | 1               | 2 | 3 | 4 | 5 | 6 | 7 | 8 | 9 | 10 | 11 | 12 | 13 | 14        | +t <sub>14</sub> |
| <b>ENROLMENT:</b>                                                                                                                                         |                 |                 |                 |   |   |   |   |   |   |   |   |    |    |    |    |           |                  |
| Eligibility screen                                                                                                                                        | ×               |                 |                 |   |   |   |   |   |   |   |   |    |    |    |    |           |                  |
| Informed consent                                                                                                                                          | ×               |                 |                 |   |   |   |   |   |   |   |   |    |    |    |    |           |                  |
| Allocation                                                                                                                                                |                 | ×               |                 |   |   |   |   |   |   |   |   |    |    |    |    |           |                  |
| <b>INTERVENTION:</b>                                                                                                                                      |                 |                 |                 |   |   |   |   |   |   |   |   |    |    |    |    |           |                  |
| HOT                                                                                                                                                       |                 | ×               | ×               | × | × | × | × | × | × | × | × | ×  | ×  | ×  | ×  | ×         | ×                |
| <b>ASSESSMENTS:</b>                                                                                                                                       |                 |                 |                 |   |   |   |   |   |   |   |   |    |    |    |    |           |                  |
| Teens only:<br>- Self reported height and weight                                                                                                          | ×               |                 |                 |   |   |   |   |   |   |   |   |    |    |    |    |           | ×                |
| Teens only:<br>- CDQ [41]<br>- Serves of core foods [42]<br>- Harter self-perception profile [47]<br>- 7-day accelerometry<br>- APARQ [45]<br>- ASAQ [46] |                 | ×               |                 |   |   |   |   |   |   |   |   |    |    |    |    |           | ×                |
| Parents only:<br>- CDQ [41]<br>- Harter self-perception profile [47]                                                                                      |                 |                 |                 |   |   |   |   |   |   |   |   |    |    |    |    |           |                  |
| Teens and parents:<br>- Engagement with HOT Moodle                                                                                                        |                 |                 | ×               | × | × | × | × | × | × | × | × | ×  | ×  | ×  | ×  | ×         |                  |
| Teens only:<br>- Engagement with HOT-BOT                                                                                                                  |                 |                 | ×               | × | × | × | × | × | × | × | × | ×  | ×  | ×  | ×  | ×         |                  |
| Teens and parents:<br>- post-program satisfaction questionnaire<br>- Interviews                                                                           |                 |                 |                 |   |   |   |   |   |   |   |   |    |    |    |    |           | ×                |

Abbreviations: BMI, body mass index; CDQ, Children’s Dietary Questionnaire; APARQ, Adolescent Physical Activity Recall Questionnaire; ASAQ, Adolescent Sedentary Assessment Questionnaire
